# Supplementary material for: Accurate and precise in situ U–Pb isotope dating of wolframite series minerals via LA-SF-ICP-MS
Source: Royal Society of Chemistry journal article supplement (doi:10.1039/d0ja00248h), 2020-01-01
Supplement: d0ja00248h2.pdf [file d0ja00248h2.pdf]

**Appendix Tables for Supporting Information**

Table S1 Major element composition of wolframite samples investigated in this study.

| Wolframite                        | Bagge  | Sewa   | MTM    | Panasqueira | Cornwall | HTD    | YGX-2107 | YGX-2113 | DP-12  | XHS16  | SHM    |
|-----------------------------------|--------|--------|--------|-------------|----------|--------|----------|----------|--------|--------|--------|
|                                   | (n=24) | (n=41) | (n=22) | (n=24)      | (n=20)   | (n=32) | (n=32)   | (n=41)   | (n=12) | (n=12) | (n=21) |
| Major element composition (wt%)   |        |        |        |             |          |        |          |          |        |        |        |
| MnO                               | 4.66   | 6.62   | 5.95   | 3.42        | 4.61     | 23.90  | 11.73    | 13.26    | 16.87  | 9.96   | 23.72  |
| FeO                               | 18.03  | 17.62  | 18.20  | 20.87       | 19.76    | 0.19   | 12.59    | 10.86    | 7.56   | 14.59  | 0.17   |
| Nb <sub>2</sub> O <sub>5</sub>    | 0.37   | 0.91   | 0.19   | 0.20        | 0.38     | 0.11   | 0.42     | 0.59     | 0.56   | 0.68   | 0.26   |
| Ta <sub>2</sub> O <sub>5</sub>    | 0.28   | 0.15   | 0.18   | 0.18        | 0.24     | 0.21   | 0.26     | 0.30     | 0.21   | 0.22   | 0.26   |
| SnO <sub>2</sub>                  | b.d.   | b.d.   | b.d.   | b.d.        | b.d.     | 0.02   | b.d.     | 0.01     | 0.02   | 0.01   | 0.03   |
| WO <sub>3</sub>                   | 76.28  | 75.48  | 75.35  | 76.68       | 76.47    | 76.39  | 75.87    | 75.40    | 75.61  | 75.89  | 76.38  |
| Sc <sub>2</sub> O <sub>3</sub>    | 0.04   | 0.02   | 0.01   | 0.01        | 0.01     | 0.02   | 0.02     | 0.02     | 0.01   | 0.08   | 0.01   |
| TiO <sub>2</sub>                  | 0.03   | 0.03   | 0.03   | 0.04        | 0.03     | 0.01   | 0.04     | 0.02     | 0.03   | 0.01   | 0.05   |
| Total                             | 99.69  | 100.84 | 99.91  | 101.39      | 101.51   | 100.85 | 100.93   | 100.45   | 100.88 | 101.43 | 100.89 |
| Atoms per unit formula (a.p.u.f.) |        |        |        |             |          |        |          |          |        |        |        |
| Mn <sup>2+</sup>                  | 0.1994 | 0.2794 | 0.2541 | 0.1441      | 0.1938   | 1.0105 | 0.4954   | 0.5623   | 0.7122 | 0.4177 | 1.0018 |
| FeO <sup>I</sup>                  | 0.7627 | 0.7345 | 0.7680 | 0.8685      | 0.8206   | 0.0079 | 0.5249   | 0.4546   | 0.3151 | 0.6043 | 0.0071 |
| Nb <sup>5+</sup>                  | 0.0085 | 0.0205 | 0.0044 | 0.0044      | 0.0086   | 0.0025 | 0.0094   | 0.0135   | 0.0127 | 0.0152 | 0.0060 |
| Ta <sup>5+</sup>                  | 0.0038 | 0.0020 | 0.0025 | 0.0024      | 0.0032   | 0.0028 | 0.0035   | 0.0041   | 0.0028 | 0.0030 | 0.0035 |
| Sn <sup>4+</sup>                  |        |        |        |             |          | 0.0004 |          | 0.0001   | 0.0004 | 0.0002 | 0.0006 |
| W <sup>6+</sup>                   | 1.0001 | 0.9751 | 0.9856 | 0.9889      | 0.9843   | 0.9883 | 0.9807   | 0.9785   | 0.9765 | 0.9745 | 0.9870 |
| Sc <sup>3+</sup>                  | 0.0018 | 0.0008 | 0.0005 | 0.0004      | 0.0004   | 0.0007 | 0.0009   | 0.0009   | 0.0005 | 0.0033 | 0.0005 |
| Ti <sup>4+</sup>                  | 0.0012 | 0.0011 | 0.0013 | 0.0014      | 0.0010   | 0.0005 | 0.0014   | 0.0006   | 0.0010 | 0.0002 | 0.0018 |
| Fe <sup>2+</sup>                  | 0.7592 | 0.7328 | 0.7669 | 0.8676      | 0.8197   | 0.0066 | 0.5231   | 0.4528   | 0.3140 | 0.5977 | 0.0060 |
| Fe <sup>3+</sup>                  | 0.0035 | 0.0017 | 0.0011 | 0.0008      | 0.0008   | 0.0013 | 0.0018   | 0.0019   | 0.0011 | 0.0066 | 0.0011 |
| Mn/(Fe+Mn)                        | 0.2062 | 0.2754 | 0.2486 | 0.1423      | 0.1910   | 0.9923 | 0.4854   | 0.5532   | 0.6934 | 0.4088 | 0.9929 |

Note: n = number of data; b.d. = below detection limit;

Atoms per unit formula are calculated on basis of 4 atoms of oxygen; Fe<sup>3+</sup> is calculated on the basis of charge balance and 2 cations.

Table S2 Individual LA-SF-ICP-MS U-Pb data of wolframite investigated in this study.

| Sample                                            | Pb   | Th<br>( $\mu\text{g g}^{-1}$ ) | U     | Th/U  | $^{238}\text{U}/^{206}\text{Pb}$ | $1\sigma$ | $^{207}\text{Pb}/^{206}\text{Pb}$ | $1\sigma$ | $^{207}\text{Pb}/^{235}\text{U}$ | $1\sigma$ | $^{206}\text{Pb}/^{238}\text{U}$ | $1\sigma$ | Rho  | $f_{206}^a$<br>(%) | $^{207}\text{Pb}$ -corrected (Ma)<br>$^{206}\text{Pb}/^{238}\text{U}$ | $1\sigma$ |
|---------------------------------------------------|------|--------------------------------|-------|-------|----------------------------------|-----------|-----------------------------------|-----------|----------------------------------|-----------|----------------------------------|-----------|------|--------------------|-----------------------------------------------------------------------|-----------|
| <b><i>Baggetorp W deposit, Sweden (Bagge)</i></b> |      |                                |       |       |                                  |           |                                   |           |                                  |           |                                  |           |      |                    |                                                                       |           |
| Bagge-1                                           | 2.23 | 0.30                           | 3.92  | 0.076 | 3.08                             | 0.05      | 0.1016                            | 0.0018    | 5.47                             | 0.21      | 0.3245                           | 0.0049    | 0.40 | 0.00               | 1825                                                                  | 32        |
| Bagge-2                                           | 3.39 | 0.64                           | 10.30 | 0.062 | 3.07                             | 0.05      | 0.1326                            | 0.0026    | 6.09                             | 0.33      | 0.3253                           | 0.0052    | 0.29 | 2.73               | 1772                                                                  | 34        |
| Bagge-3                                           | 2.71 | 0.37                           | 6.18  | 0.060 | 3.07                             | 0.05      | 0.1467                            | 0.0030    | 6.30                             | 0.38      | 0.3259                           | 0.0054    | 0.28 | 4.34               | 1749                                                                  | 35        |
| Bagge-4                                           | 3.17 | 0.62                           | 10.15 | 0.061 | 3.12                             | 0.05      | 0.1116                            | 0.0021    | 4.94                             | 0.21      | 0.3205                           | 0.0050    | 0.36 | 0.32               | 1787                                                                  | 32        |
| Bagge-5                                           | 3.08 | 0.55                           | 8.95  | 0.061 | 3.10                             | 0.05      | 0.1202                            | 0.0021    | 5.39                             | 0.21      | 0.3223                           | 0.0049    | 0.40 | 1.30               | 1780                                                                  | 32        |
| Bagge-6                                           | 3.82 | 0.71                           | 10.50 | 0.068 | 3.07                             | 0.05      | 0.1280                            | 0.0029    | 6.42                             | 0.45      | 0.3256                           | 0.0055    | 0.24 | 2.20               | 1782                                                                  | 35        |
| Bagge-7                                           | 3.32 | 0.90                           | 11.50 | 0.078 | 3.13                             | 0.05      | 0.1093                            | 0.0024    | 4.71                             | 0.29      | 0.3198                           | 0.0053    | 0.27 | 0.06               | 1788                                                                  | 34        |
| Bagge-8                                           | 1.86 | 0.06                           | 5.52  | 0.010 | 3.09                             | 0.06      | 0.1128                            | 0.0036    | 4.81                             | 0.50      | 0.3236                           | 0.0066    | 0.19 | 0.46               | 1800                                                                  | 42        |
| Bagge-9                                           | 2.06 | 21.02                          | 9.94  | 2.115 | 3.13                             | 0.05      | 0.1048                            | 0.0024    | 4.63                             | 0.29      | 0.3199                           | 0.0053    | 0.27 | 0.00               | 1797                                                                  | 34        |
| Bagge-10                                          | 1.81 | 0.07                           | 6.13  | 0.012 | 3.04                             | 0.07      | 0.1449                            | 0.0050    | 7.25                             | 0.98      | 0.3290                           | 0.0075    | 0.17 | 5.35               | 1748                                                                  | 48        |
| Bagge-11                                          | 2.16 | 0.10                           | 7.77  | 0.010 | 3.12                             | 0.05      | 0.1016                            | 0.0020    | 4.56                             | 0.23      | 0.3207                           | 0.0051    | 0.32 | 0.33               | 1788                                                                  | 33        |
| Bagge-12                                          | 1.25 | 0.01                           | 4.41  | 0.001 | 3.12                             | 0.06      | 0.0983                            | 0.0030    | 4.65                             | 0.49      | 0.3204                           | 0.0063    | 0.18 | 0.00               | 1793                                                                  | 40        |
| <b><i>Rwanda (Sewa)</i></b>                       |      |                                |       |       |                                  |           |                                   |           |                                  |           |                                  |           |      |                    |                                                                       |           |
| Sewa-1                                            | 1.79 | 0.29                           | 14.11 | 0.021 | 7.57                             | 0.12      | 0.0751                            | 0.0019    | 1.36                             | 0.06      | 0.1321                           | 0.0021    | 0.35 | 1.16               | 791.2                                                                 | 13.3      |
| Sewa-2                                            | 3.04 | 0.41                           | 23.77 | 0.017 | 7.53                             | 0.11      | 0.0757                            | 0.0016    | 1.40                             | 0.04      | 0.1328                           | 0.0020    | 0.47 | 1.24               | 794.5                                                                 | 12.6      |
| Sewa-3                                            | 3.45 | 0.48                           | 27.65 | 0.017 | 7.60                             | 0.11      | 0.0692                            | 0.0015    | 1.25                             | 0.04      | 0.1315                           | 0.0019    | 0.46 | 0.45               | 793.2                                                                 | 12.5      |
| Sewa-4                                            | 3.38 | 0.48                           | 23.26 | 0.021 | 7.36                             | 0.11      | 0.1024                            | 0.0020    | 1.88                             | 0.05      | 0.1359                           | 0.0020    | 0.51 | 4.47               | 787.1                                                                 | 12.8      |
| Sewa-5                                            | 4.76 | 0.38                           | 18.74 | 0.020 | 7.58                             | 0.12      | 0.0691                            | 0.0019    | 1.32                             | 0.07      | 0.1319                           | 0.0021    | 0.32 | 0.43               | 795.4                                                                 | 13.6      |
| Sewa-6                                            | 2.51 | 0.38                           | 18.86 | 0.020 | 7.51                             | 0.11      | 0.0821                            | 0.0019    | 1.50                             | 0.06      | 0.1332                           | 0.0020    | 0.39 | 2.00               | 790.9                                                                 | 13.0      |
| Sewa-7                                            | 2.36 | 0.52                           | 18.83 | 0.028 | 7.58                             | 0.11      | 0.0730                            | 0.0017    | 1.34                             | 0.05      | 0.1319                           | 0.0020    | 0.38 | 0.91               | 791.7                                                                 | 12.9      |
| Sewa-8                                            | 2.41 | 0.57                           | 16.38 | 0.035 | 7.25                             | 0.11      | 0.1104                            | 0.0023    | 2.11                             | 0.08      | 0.1380                           | 0.0021    | 0.40 | 5.43               | 790.8                                                                 | 13.3      |
| Sewa-9                                            | 2.04 | 0.36                           | 16.01 | 0.022 | 7.59                             | 0.11      | 0.0732                            | 0.0016    | 1.28                             | 0.05      | 0.1317                           | 0.0020    | 0.41 | 0.93               | 790.4                                                                 | 12.6      |
| Sewa-10                                           | 2.67 | 0.48                           | 13.83 | 0.034 | 6.76                             | 0.10      | 0.1757                            | 0.0034    | 3.54                             | 0.12      | 0.1479                           | 0.0022    | 0.44 | 13.3               | 777.5                                                                 | 14.0      |
| Sewa-11                                           | 3.27 | 0.37                           | 21.39 | 0.017 | 7.25                             | 0.10      | 0.1114                            | 0.0021    | 2.14                             | 0.06      | 0.1379                           | 0.0020    | 0.51 | 5.56               | 789.1                                                                 | 12.8      |
| Sewa-12                                           | 2.63 | 0.31                           | 18.75 | 0.017 | 7.43                             | 0.11      | 0.0911                            | 0.0018    | 1.68                             | 0.05      | 0.1347                           | 0.0019    | 0.48 | 3.10               | 790.6                                                                 | 12.5      |
| Sewa-13                                           | 4.07 | 0.30                           | 18.48 | 0.016 | 6.45                             | 0.09      | 0.2121                            | 0.0039    | 4.42                             | 0.14      | 0.1550                           | 0.0023    | 0.46 | 17.7               | 773.5                                                                 | 14.5      |
| Sewa-14                                           | 3.25 | 0.19                           | 10.63 | 0.018 | 6.31                             | 0.10      | 0.2268                            | 0.0050    | 4.96                             | 0.27      | 0.1585                           | 0.0026    | 0.30 | 19.5               | 773.7                                                                 | 16.6      |
| Sewa-15                                           | 3.30 | 0.45                           | 25.61 | 0.018 | 7.63                             | 0.11      | 0.0686                            | 0.0015    | 1.23                             | 0.04      | 0.1310                           | 0.0019    | 0.41 | 0.37               | 790.8                                                                 | 12.4      |
| Sewa-16                                           | 4.81 | 0.58                           | 31.78 | 0.018 | 7.36                             | 0.10      | 0.0965                            | 0.0018    | 1.83                             | 0.05      | 0.1358                           | 0.0019    | 0.55 | 3.75               | 792.0                                                                 | 12.3      |
| Sewa-17                                           | 4.74 | 0.61                           | 35.10 | 0.017 | 7.57                             | 0.11      | 0.0745                            | 0.0017    | 1.35                             | 0.05      | 0.1322                           | 0.0020    | 0.39 | 1.09               | 792.0                                                                 | 12.6      |
| Sewa-18                                           | 4.55 | 0.51                           | 28.87 | 0.018 | 7.28                             | 0.10      | 0.1056                            | 0.0020    | 2.04                             | 0.06      | 0.1374                           | 0.0020    | 0.47 | 4.86               | 791.8                                                                 | 12.7      |
| Sewa-19                                           | 4.78 | 0.50                           | 28.60 | 0.018 | 6.96                             | 0.10      | 0.1492                            | 0.0028    | 2.94                             | 0.09      | 0.1438                           | 0.0021    | 0.45 | 10.1               | 783.3                                                                 | 13.3      |
| Sewa-20                                           | 3.57 | 0.45                           | 16.17 | 0.028 | 7.31                             | 0.11      | 0.1012                            | 0.0024    | 2.00                             | 0.10      | 0.1368                           | 0.0021    | 0.32 | 4.32               | 793.0                                                                 | 13.7      |
| Sewa-21                                           | 2.75 | 0.35                           | 15.56 | 0.022 | 6.92                             | 0.10      | 0.1511                            | 0.0032    | 3.06                             | 0.13      | 0.1446                           | 0.0022    | 0.36 | 10.4               | 785.5                                                                 | 14.1      |

Table S2 (continued)

| Sample                                                         | Pb   | Th<br>( $\mu\text{g g}^{-1}$ ) | U      | Th/U  | $^{238}\text{U}$<br>$/^{206}\text{Pb}$ | $1\sigma$ | $^{207}\text{Pb}$<br>$/^{206}\text{Pb}$ | $1\sigma$ | $^{207}\text{Pb}$<br>$/^{235}\text{U}$ | $1\sigma$ | $^{206}\text{Pb}$<br>$/^{238}\text{U}$ | $1\sigma$ | Rho  | $f_{206}^a$<br>(%) | $^{207}\text{Pb}$ -corrected (Ma)<br>$^{206}\text{Pb}/^{238}\text{U}$ | $1\sigma$ |
|----------------------------------------------------------------|------|--------------------------------|--------|-------|----------------------------------------|-----------|-----------------------------------------|-----------|----------------------------------------|-----------|----------------------------------------|-----------|------|--------------------|-----------------------------------------------------------------------|-----------|
| <i>Les Montmins, France (MTM)</i>                              |      |                                |        |       |                                        |           |                                         |           |                                        |           |                                        |           |      |                    |                                                                       |           |
| MTM-1                                                          | 2.49 | 0.04                           | 43.90  | 0.001 | 18.80                                  | 0.33      | 0.0617                                  | 0.0019    | 0.439                                  | 0.018     | 0.0532                                 | 0.0009    | 0.42 | 1.06               | 330.6                                                                 | 5.9       |
| MTM-2                                                          | 1.70 | 0.02                           | 36.60  | 0.001 | 18.88                                  | 0.32      | 0.0554                                  | 0.0019    | 0.391                                  | 0.017     | 0.0530                                 | 0.0009    | 0.40 | 0.29               | 331.8                                                                 | 5.9       |
| MTM-3                                                          | 2.05 | 0.08                           | 39.30  | 0.002 | 18.81                                  | 0.38      | 0.0517                                  | 0.0025    | 0.376                                  | 0.025     | 0.0532                                 | 0.0011    | 0.31 | 0.00               | 334.5                                                                 | 7.0       |
| MTM-4                                                          | 1.35 | 0.01                           | 31.34  | 0.000 | 18.59                                  | 0.39      | 0.0529                                  | 0.0026    | 0.389                                  | 0.028     | 0.0538                                 | 0.0011    | 0.30 | 0.00               | 337.9                                                                 | 7.3       |
| MTM-5                                                          | 0.96 | 0.01                           | 21.18  | 0.000 | 18.94                                  | 0.38      | 0.0520                                  | 0.0024    | 0.376                                  | 0.024     | 0.0528                                 | 0.0011    | 0.32 | 0.00               | 332.2                                                                 | 6.8       |
| MTM-6                                                          | 0.74 | 0.01                           | 16.72  | 0.000 | 18.83                                  | 0.50      | 0.0512                                  | 0.0038    | 0.389                                  | 0.041     | 0.0531                                 | 0.0014    | 0.25 | 0.00               | 334.3                                                                 | 9.0       |
| MTM-7                                                          | 0.90 | 0.01                           | 19.42  | 0.000 | 18.73                                  | 0.37      | 0.0495                                  | 0.0023    | 0.374                                  | 0.024     | 0.0534                                 | 0.0011    | 0.31 | 0.00               | 336.7                                                                 | 6.8       |
| MTM-8                                                          | 0.96 | 0.01                           | 21.28  | 0.001 | 19.02                                  | 0.38      | 0.0499                                  | 0.0024    | 0.355                                  | 0.023     | 0.0526                                 | 0.0010    | 0.31 | 0.00               | 331.6                                                                 | 6.7       |
| MTM-9                                                          | 1.47 | 0.02                           | 30.70  | 0.001 | 18.85                                  | 0.33      | 0.0498                                  | 0.0018    | 0.368                                  | 0.017     | 0.0531                                 | 0.0009    | 0.38 | 0.00               | 334.6                                                                 | 6.0       |
| MTM-10                                                         | 1.98 | 0.04                           | 44.80  | 0.001 | 18.85                                  | 0.32      | 0.0498                                  | 0.0018    | 0.368                                  | 0.017     | 0.0530                                 | 0.0009    | 0.36 | 0.00               | 334.5                                                                 | 5.9       |
| MTM-11                                                         | 1.58 | 0.03                           | 35.40  | 0.001 | 18.81                                  | 0.37      | 0.0529                                  | 0.0024    | 0.393                                  | 0.025     | 0.0532                                 | 0.0011    | 0.31 | 0.00               | 334.0                                                                 | 6.8       |
| MTM-12                                                         | 0.91 | 0.01                           | 20.46  | 0.001 | 18.61                                  | 0.51      | 0.0494                                  | 0.0040    | 0.380                                  | 0.044     | 0.0537                                 | 0.0015    | 0.24 | 0.00               | 338.9                                                                 | 9.5       |
| MTM-13                                                         | 0.83 | 0.01                           | 18.39  | 0.001 | 18.72                                  | 0.38      | 0.0518                                  | 0.0025    | 0.365                                  | 0.024     | 0.0534                                 | 0.0011    | 0.31 | 0.00               | 336.1                                                                 | 7.0       |
| MTM-14                                                         | 1.89 | 0.04                           | 40.70  | 0.001 | 18.85                                  | 0.33      | 0.0624                                  | 0.0022    | 0.437                                  | 0.021     | 0.0530                                 | 0.0009    | 0.37 | 1.16               | 329.4                                                                 | 6.0       |
| MTM-15                                                         | 0.76 | 0.01                           | 17.03  | 0.000 | 18.52                                  | 0.81      | 0.0523                                  | 0.0070    | 0.390                                  | 0.073     | 0.0540                                 | 0.0024    | 0.23 | 0.00               | 339.4                                                                 | 15.3      |
| MTM-16                                                         | 0.75 | 0.01                           | 16.88  | 0.000 | 18.87                                  | 0.40      | 0.0513                                  | 0.0027    | 0.373                                  | 0.028     | 0.0530                                 | 0.0011    | 0.29 | 0.00               | 333.6                                                                 | 7.2       |
| <i>Yaogangxian W deposit, Hunan Province, China (YGX-2107)</i> |      |                                |        |       |                                        |           |                                         |           |                                        |           |                                        |           |      |                    |                                                                       |           |
| YGX-2107-1                                                     | 0.89 | 0.59                           | 39.90  | 0.015 | 39.17                                  | 0.66      | 0.0491                                  | 0.0017    | 0.171                                  | 0.007     | 0.02553                                | 0.00043   | 0.44 | 0.00               | 162.5                                                                 | 2.8       |
| YGX-2107-2                                                     | 0.42 | 0.23                           | 17.40  | 0.013 | 39.68                                  | 0.85      | 0.0525                                  | 0.0030    | 0.177                                  | 0.012     | 0.02520                                | 0.00054   | 0.32 | 0.42               | 159.8                                                                 | 3.5       |
| YGX-2107-3                                                     | 0.59 | 0.19                           | 25.51  | 0.008 | 39.20                                  | 0.66      | 0.0498                                  | 0.0019    | 0.174                                  | 0.007     | 0.02551                                | 0.00043   | 0.41 | 0.08               | 162.3                                                                 | 2.8       |
| YGX-2107-4                                                     | 0.83 | 0.23                           | 37.63  | 0.006 | 38.79                                  | 0.63      | 0.0482                                  | 0.0015    | 0.168                                  | 0.006     | 0.02578                                | 0.00042   | 0.47 | 0.00               | 164.3                                                                 | 2.7       |
| YGX-2107-5                                                     | 1.24 | 1.00                           | 45.60  | 0.022 | 39.97                                  | 0.70      | 0.0500                                  | 0.0025    | 0.172                                  | 0.009     | 0.02502                                | 0.00044   | 0.32 | 0.11               | 159.1                                                                 | 2.8       |
| YGX-2107-6                                                     | 0.43 | 0.21                           | 17.67  | 0.012 | 39.05                                  | 0.73      | 0.0474                                  | 0.0023    | 0.168                                  | 0.009     | 0.02561                                | 0.00048   | 0.35 | 0.00               | 163.4                                                                 | 3.1       |
| YGX-2107-7                                                     | 0.15 | 0.07                           | 6.30   | 0.011 | 39.28                                  | 0.93      | 0.0477                                  | 0.0038    | 0.169                                  | 0.015     | 0.02546                                | 0.00060   | 0.26 | 0.00               | 162.4                                                                 | 3.9       |
| YGX-2107-8                                                     | 0.16 | 0.15                           | 7.33   | 0.021 | 39.78                                  | 1.80      | 0.0448                                  | 0.0090    | 0.171                                  | 0.040     | 0.02514                                | 0.00114   | 0.19 | 0.00               | 160.9                                                                 | 7.3       |
| YGX-2107-9                                                     | 0.49 | 0.59                           | 22.00  | 0.027 | 38.88                                  | 1.21      | 0.0495                                  | 0.0049    | 0.171                                  | 0.020     | 0.02572                                | 0.00080   | 0.26 | 0.04               | 163.6                                                                 | 5.2       |
| YGX-2107-10                                                    | 0.34 | 0.35                           | 14.23  | 0.025 | 40.19                                  | 0.97      | 0.0528                                  | 0.0037    | 0.181                                  | 0.015     | 0.02488                                | 0.00060   | 0.29 | 0.46               | 157.7                                                                 | 3.9       |
| YGX-2107-11                                                    | 0.49 | 0.39                           | 21.25  | 0.018 | 39.81                                  | 2.04      | 0.0578                                  | 0.0090    | 0.182                                  | 0.035     | 0.02512                                | 0.00129   | 0.27 | 1.08               | 158.2                                                                 | 8.3       |
| YGX-2107-12                                                    | 0.41 | 0.35                           | 17.48  | 0.020 | 39.53                                  | 0.70      | 0.0487                                  | 0.0020    | 0.168                                  | 0.008     | 0.02530                                | 0.00045   | 0.38 | 0.00               | 161.2                                                                 | 2.9       |
| YGX-2107-13                                                    | 1.59 | 1.19                           | 67.40  | 0.018 | 39.98                                  | 0.83      | 0.0500                                  | 0.0026    | 0.180                                  | 0.011     | 0.02501                                | 0.00052   | 0.33 | 0.10               | 159.1                                                                 | 3.4       |
| YGX-2107-14                                                    | 3.46 | 1.60                           | 151.80 | 0.011 | 39.17                                  | 0.58      | 0.0471                                  | 0.0009    | 0.171                                  | 0.004     | 0.02553                                | 0.00038   | 0.71 | 0.00               | 162.9                                                                 | 2.4       |
| YGX-2107-15                                                    | 0.26 | 0.14                           | 10.60  | 0.013 | 39.87                                  | 1.86      | 0.0516                                  | 0.0079    | 0.175                                  | 0.032     | 0.02508                                | 0.00117   | 0.25 | 0.31               | 159.2                                                                 | 7.5       |
| YGX-2107-16                                                    | 0.16 | 0.11                           | 6.94   | 0.016 | 39.57                                  | 1.30      | 0.0507                                  | 0.0054    | 0.168                                  | 0.021     | 0.02527                                | 0.00083   | 0.26 | 0.20               | 160.6                                                                 | 5.3       |
| YGX-2107-17                                                    | 0.93 | 0.48                           | 40.90  | 0.012 | 39.42                                  | 1.35      | 0.0546                                  | 0.0056    | 0.182                                  | 0.023     | 0.02537                                | 0.00087   | 0.27 | 0.68               | 160.4                                                                 | 5.6       |

Table S2 (continued)

| Sample                                                             | Pb   | Th<br>( $\mu\text{g g}^{-1}$ ) | U     | Th/U  | $^{238}\text{U}$ /<br>$^{206}\text{Pb}$ | $1\sigma$ | $^{207}\text{Pb}$ /<br>$^{206}\text{Pb}$ | $1\sigma$ | $^{207}\text{Pb}$ /<br>$^{235}\text{U}$ | $1\sigma$ | $^{206}\text{Pb}$ /<br>$^{238}\text{U}$ | $1\sigma$ | Rho  | $f_{206}^a$<br>(%) | $^{207}\text{Pb}$ -corrected (Ma)<br>$^{206}\text{Pb}/^{238}\text{U}$ | $1\sigma$ |
|--------------------------------------------------------------------|------|--------------------------------|-------|-------|-----------------------------------------|-----------|------------------------------------------|-----------|-----------------------------------------|-----------|-----------------------------------------|-----------|------|--------------------|-----------------------------------------------------------------------|-----------|
| YGX-2107-18                                                        | 0.67 | 0.37                           | 29.00 | 0.013 | 39.48                                   | 0.65      | 0.0498                                   | 0.0017    | 0.174                                   | 0.006     | 0.02533                                 | 0.00042   | 0.44 | 0.08               | 161.1                                                                 | 2.7       |
| YGX-2107-19                                                        | 1.02 | 1.33                           | 44.90 | 0.030 | 40.14                                   | 0.81      | 0.0535                                   | 0.0026    | 0.182                                   | 0.011     | 0.02491                                 | 0.00050   | 0.34 | 0.55               | 157.8                                                                 | 3.2       |
| <b><i>Xihuashan W deposit, Jiangxi Province, China (XHS16)</i></b> |      |                                |       |       |                                         |           |                                          |           |                                         |           |                                         |           |      |                    |                                                                       |           |
| XHS16-1                                                            | 0.36 | 0.25                           | 15.35 | 0.016 | 39.56                                   | 0.72      | 0.0500                                   | 0.0021    | 0.177                                   | 0.008     | 0.02528                                 | 0.00046   | 0.39 | 0.09               | 160.8                                                                 | 3.0       |
| XHS16-2                                                            | 0.23 | 0.16                           | 9.47  | 0.016 | 39.49                                   | 1.05      | 0.0511                                   | 0.0038    | 0.174                                   | 0.015     | 0.02532                                 | 0.00067   | 0.30 | 0.23               | 160.8                                                                 | 4.3       |
| XHS16-3                                                            | 0.46 | 0.33                           | 20.40 | 0.016 | 39.56                                   | 0.80      | 0.0472                                   | 0.0023    | 0.167                                   | 0.009     | 0.02528                                 | 0.00051   | 0.36 | 0.00               | 161.4                                                                 | 3.3       |
| XHS16-4                                                            | 0.40 | 0.28                           | 17.42 | 0.016 | 39.28                                   | 0.76      | 0.0459                                   | 0.0021    | 0.166                                   | 0.009     | 0.02546                                 | 0.00049   | 0.36 | 0.00               | 162.7                                                                 | 3.2       |
| XHS16-5                                                            | 0.84 | 0.64                           | 38.02 | 0.017 | 39.48                                   | 0.70      | 0.0505                                   | 0.0018    | 0.175                                   | 0.007     | 0.02533                                 | 0.00045   | 0.44 | 0.15               | 161.0                                                                 | 2.9       |
| XHS16-6                                                            | 0.15 | 0.09                           | 6.21  | 0.015 | 40.23                                   | 2.62      | 0.0535                                   | 0.0121    | 0.176                                   | 0.048     | 0.02486                                 | 0.00162   | 0.24 | 0.53               | 157.5                                                                 | 10.4      |
| XHS16-7                                                            | 0.10 | 0.08                           | 4.59  | 0.018 | 39.71                                   | 1.17      | 0.0524                                   | 0.0050    | 0.175                                   | 0.019     | 0.02518                                 | 0.00074   | 0.27 | 0.39               | 159.7                                                                 | 4.8       |
| XHS16-8                                                            | 0.16 | 0.14                           | 6.54  | 0.021 | 39.51                                   | 2.45      | 0.0650                                   | 0.0119    | 0.188                                   | 0.041     | 0.02531                                 | 0.00157   | 0.29 | 1.98               | 158.0                                                                 | 10.1      |
| XHS16-9                                                            | 0.13 | 0.17                           | 5.21  | 0.032 | 38.87                                   | 2.93      | 0.0571                                   | 0.0141    | 0.180                                   | 0.052     | 0.02573                                 | 0.00194   | 0.26 | 0.98               | 162.2                                                                 | 12.5      |
| XHS16-10                                                           | 0.09 | 0.06                           | 3.85  | 0.015 | 39.76                                   | 1.08      | 0.0522                                   | 0.0051    | 0.178                                   | 0.019     | 0.02515                                 | 0.00068   | 0.25 | 0.37               | 159.5                                                                 | 4.4       |
| XHS16-11                                                           | 0.14 | 0.10                           | 6.10  | 0.016 | 38.94                                   | 1.20      | 0.0523                                   | 0.0050    | 0.182                                   | 0.020     | 0.02568                                 | 0.00079   | 0.28 | 0.38               | 162.8                                                                 | 5.1       |
| XHS16-12                                                           | 0.17 | 0.14                           | 7.41  | 0.019 | 39.67                                   | 0.91      | 0.0536                                   | 0.0035    | 0.181                                   | 0.014     | 0.02521                                 | 0.00058   | 0.31 | 0.54               | 159.6                                                                 | 3.7       |
| XHS16-13                                                           | 0.31 | 0.10                           | 12.28 | 0.008 | 39.14                                   | 0.83      | 0.0485                                   | 0.0027    | 0.175                                   | 0.011     | 0.02555                                 | 0.00054   | 0.33 | 0.00               | 162.8                                                                 | 3.5       |
| XHS16-14                                                           | 0.17 | 0.13                           | 7.68  | 0.016 | 39.31                                   | 1.14      | 0.0505                                   | 0.0043    | 0.171                                   | 0.017     | 0.02544                                 | 0.00074   | 0.29 | 0.15               | 161.7                                                                 | 4.8       |
| XHS16-15                                                           | 0.20 | 0.14                           | 8.64  | 0.017 | 39.62                                   | 0.83      | 0.0516                                   | 0.0027    | 0.178                                   | 0.011     | 0.02524                                 | 0.00053   | 0.35 | 0.29               | 160.2                                                                 | 3.4       |
| XHS16-16                                                           | 0.24 | 0.18                           | 10.92 | 0.016 | 39.32                                   | 0.96      | 0.0516                                   | 0.0035    | 0.182                                   | 0.014     | 0.02543                                 | 0.00062   | 0.31 | 0.29               | 161.4                                                                 | 4.0       |
| XHS16-17                                                           | 0.05 | 0.03                           | 2.33  | 0.014 | 39.60                                   | 1.52      | 0.0547                                   | 0.0083    | 0.176                                   | 0.029     | 0.02525                                 | 0.00097   | 0.23 | 0.69               | 159.7                                                                 | 6.2       |
| XHS16-18                                                           | 0.12 | 0.11                           | 4.57  | 0.025 | 39.79                                   | 1.66      | 0.0500                                   | 0.0078    | 0.181                                   | 0.033     | 0.02513                                 | 0.00105   | 0.23 | 0.10               | 159.8                                                                 | 6.8       |
| XHS16-19                                                           | 0.23 | 0.18                           | 9.63  | 0.019 | 38.77                                   | 1.58      | 0.0522                                   | 0.0066    | 0.186                                   | 0.028     | 0.02579                                 | 0.00105   | 0.27 | 0.37               | 163.5                                                                 | 6.8       |
| XHS16-20                                                           | 0.20 | 0.15                           | 8.22  | 0.018 | 39.71                                   | 0.90      | 0.0552                                   | 0.0034    | 0.187                                   | 0.013     | 0.02518                                 | 0.00057   | 0.32 | 0.74               | 159.1                                                                 | 3.7       |
| <b><i>Dangping W deposit, Jiangxi Province, China (DP-12)</i></b>  |      |                                |       |       |                                         |           |                                          |           |                                         |           |                                         |           |      |                    |                                                                       |           |
| DP-12-1                                                            | 1.26 | 0.78                           | 55.20 | 0.014 | 39.90                                   | 0.65      | 0.0509                                   | 0.0014    | 0.182                                   | 0.005     | 0.02506                                 | 0.00041   | 0.54 | 0.21               | 159.2                                                                 | 2.6       |
| DP-12-2                                                            | 1.31 | 0.83                           | 59.70 | 0.014 | 39.34                                   | 0.77      | 0.0463                                   | 0.0021    | 0.169                                   | 0.009     | 0.02542                                 | 0.00050   | 0.38 | 0.00               | 162.4                                                                 | 3.2       |
| DP-12-3                                                            | 0.52 | 0.27                           | 22.28 | 0.012 | 40.39                                   | 0.73      | 0.0503                                   | 0.0019    | 0.177                                   | 0.007     | 0.02476                                 | 0.00045   | 0.43 | 0.13               | 157.5                                                                 | 2.9       |
| DP-12-4                                                            | 0.41 | 0.19                           | 18.46 | 0.010 | 38.94                                   | 0.99      | 0.0461                                   | 0.0034    | 0.171                                   | 0.014     | 0.02568                                 | 0.00065   | 0.30 | 0.00               | 164.1                                                                 | 4.2       |
| DP-12-5                                                            | 0.53 | 0.19                           | 23.64 | 0.008 | 39.49                                   | 1.20      | 0.0458                                   | 0.0041    | 0.170                                   | 0.018     | 0.02532                                 | 0.00077   | 0.29 | 0.00               | 161.9                                                                 | 5.0       |
| DP-12-6                                                            | 0.44 | 0.24                           | 19.25 | 0.012 | 39.76                                   | 0.82      | 0.0506                                   | 0.0024    | 0.183                                   | 0.010     | 0.02515                                 | 0.00052   | 0.37 | 0.17               | 159.9                                                                 | 3.4       |
| DP-12-7                                                            | 1.43 | 0.52                           | 62.80 | 0.008 | 39.82                                   | 0.65      | 0.0510                                   | 0.0013    | 0.183                                   | 0.005     | 0.02511                                 | 0.00041   | 0.58 | 0.22               | 159.5                                                                 | 2.6       |
| DP-12-8                                                            | 1.19 | 0.36                           | 42.00 | 0.009 | 38.79                                   | 1.11      | 0.0522                                   | 0.0041    | 0.175                                   | 0.016     | 0.02578                                 | 0.00074   | 0.31 | 0.37               | 163.5                                                                 | 4.8       |
| DP-12-9                                                            | 1.99 | 0.70                           | 83.40 | 0.008 | 39.81                                   | 0.65      | 0.0483                                   | 0.0011    | 0.174                                   | 0.005     | 0.02512                                 | 0.00041   | 0.62 | 0.00               | 160.1                                                                 | 2.6       |
| DP-12-10                                                           | 0.84 | 0.27                           | 37.80 | 0.007 | 39.48                                   | 0.69      | 0.0486                                   | 0.0015    | 0.170                                   | 0.006     | 0.02533                                 | 0.00044   | 0.49 | 0.00               | 161.4                                                                 | 2.8       |
| DP-12-11                                                           | 0.78 | 0.27                           | 34.20 | 0.008 | 40.52                                   | 0.79      | 0.0536                                   | 0.0022    | 0.178                                   | 0.008     | 0.02468                                 | 0.00048   | 0.42 | 0.55               | 156.3                                                                 | 3.1       |

Table S2 (continued)

| Sample                                                            | Pb   | Th<br>( $\mu\text{g g}^{-1}$ ) | U      | Th/U  | $^{238}\text{U}$<br>/ $^{206}\text{Pb}$ | $1\sigma$ | $^{207}\text{Pb}$<br>/ $^{206}\text{Pb}$ | $1\sigma$ | $^{207}\text{Pb}$<br>/ $^{235}\text{U}$ | $1\sigma$ | $^{206}\text{Pb}$<br>/ $^{238}\text{U}$ | $1\sigma$ | Rho  | $f_{206}^a$<br>(%) | $^{207}\text{Pb}$ -corrected (Ma)<br>$^{206}\text{Pb}/^{238}\text{U}$ | $1\sigma$ |
|-------------------------------------------------------------------|------|--------------------------------|--------|-------|-----------------------------------------|-----------|------------------------------------------|-----------|-----------------------------------------|-----------|-----------------------------------------|-----------|------|--------------------|-----------------------------------------------------------------------|-----------|
| DP-12-12                                                          | 0.52 | 0.18                           | 21.21  | 0.008 | 39.09                                   | 1.25      | 0.0544                                   | 0.0049    | 0.180                                   | 0.019     | 0.02558                                 | 0.00082   | 0.30 | 0.64               | 161.8                                                                 | 5.3       |
| DP-12-13                                                          | 0.67 | 0.28                           | 29.80  | 0.009 | 40.16                                   | 0.97      | 0.0496                                   | 0.0030    | 0.179                                   | 0.013     | 0.02490                                 | 0.00060   | 0.33 | 0.05               | 158.5                                                                 | 3.9       |
| DP-12-14                                                          | 2.81 | 0.91                           | 125.80 | 0.007 | 39.37                                   | 0.62      | 0.0484                                   | 0.0010    | 0.171                                   | 0.004     | 0.02540                                 | 0.00040   | 0.68 | 0.00               | 161.9                                                                 | 2.6       |
| DP-12-15                                                          | 2.00 | 0.58                           | 84.70  | 0.007 | 40.02                                   | 0.64      | 0.0490                                   | 0.0011    | 0.170                                   | 0.004     | 0.02499                                 | 0.00040   | 0.65 | 0.00               | 159.2                                                                 | 2.6       |
| DP-12-16                                                          | 2.75 | 0.84                           | 125.90 | 0.007 | 39.14                                   | 0.63      | 0.0464                                   | 0.0011    | 0.166                                   | 0.004     | 0.02555                                 | 0.00041   | 0.64 | 0.00               | 163.2                                                                 | 2.6       |
| DP-12-17                                                          | 0.36 | 0.17                           | 16.57  | 0.010 | 38.31                                   | 0.88      | 0.0484                                   | 0.0029    | 0.172                                   | 0.012     | 0.02610                                 | 0.00060   | 0.33 | 0.00               | 166.3                                                                 | 3.9       |
| DP-12-18                                                          | 0.96 | 0.40                           | 43.10  | 0.009 | 38.71                                   | 0.69      | 0.0462                                   | 0.0015    | 0.166                                   | 0.006     | 0.02583                                 | 0.00046   | 0.47 | 0.00               | 165.0                                                                 | 3.0       |
| DP-12-19                                                          | 5.33 | 2.20                           | 250.10 | 0.009 | 38.52                                   | 0.61      | 0.0456                                   | 0.0009    | 0.167                                   | 0.004     | 0.02596                                 | 0.00041   | 0.70 | 0.00               | 166.0                                                                 | 2.6       |
| <b><i>Panasqueira W-Sn-Cu deposit, Portugal (Panasqueira)</i></b> |      |                                |        |       |                                         |           |                                          |           |                                         |           |                                         |           |      |                    |                                                                       |           |
| Panasqueira-1                                                     | 0.07 | 0.00                           | 1.56   | 0.003 | 19.83                                   | 1.07      | 0.0422                                   | 0.0076    | 0.361                                   | 0.089     | 0.0504                                  | 0.0027    | 0.22 | 0.00               | 321.1                                                                 | 17.4      |
| Panasqueira-2                                                     | 0.06 | 0.00                           | 1.38   | 0.002 | 19.62                                   | 1.02      | 0.0507                                   | 0.0077    | 0.351                                   | 0.074     | 0.0510                                  | 0.0026    | 0.25 | 0.00               | 321.2                                                                 | 17.0      |
| Panasqueira-3                                                     | 0.12 | 0.01                           | 2.07   | 0.003 | 19.53                                   | 0.65      | 0.0582                                   | 0.0051    | 0.359                                   | 0.042     | 0.0512                                  | 0.0017    | 0.29 | 0.70               | 319.7                                                                 | 11.0      |
| Panasqueira-4                                                     | 0.08 | 0.00                           | 1.71   | 0.002 | 20.08                                   | 0.69      | 0.0527                                   | 0.0053    | 0.363                                   | 0.052     | 0.0498                                  | 0.0017    | 0.24 | 0.01               | 313.3                                                                 | 10.9      |
| Panasqueira-5                                                     | 0.35 | 0.01                           | 4.02   | 0.003 | 19.76                                   | 0.71      | 0.0519                                   | 0.0049    | 0.347                                   | 0.047     | 0.0506                                  | 0.0018    | 0.27 | 0.00               | 318.5                                                                 | 11.7      |
| Panasqueira-6                                                     | 0.09 | 0.01                           | 2.07   | 0.002 | 19.90                                   | 1.40      | 0.0616                                   | 0.0122    | 0.368                                   | 0.099     | 0.0502                                  | 0.0035    | 0.26 | 1.13               | 312.5                                                                 | 22.8      |
| Panasqueira-7                                                     | 0.09 | 0.00                           | 2.06   | 0.001 | 20.10                                   | 1.20      | 0.0569                                   | 0.0095    | 0.356                                   | 0.083     | 0.0498                                  | 0.0030    | 0.26 | 0.54               | 311.3                                                                 | 19.2      |
| Panasqueira-8                                                     | 0.07 | 0.00                           | 1.46   | 0.002 | 20.15                                   | 0.64      | 0.0600                                   | 0.0063    | 0.373                                   | 0.047     | 0.0496                                  | 0.0016    | 0.25 | 0.93               | 309.4                                                                 | 10.2      |
| Panasqueira-9                                                     | 0.20 | 0.00                           | 4.64   | 0.001 | 19.49                                   | 1.22      | 0.0450                                   | 0.0089    | 0.350                                   | 0.104     | 0.0513                                  | 0.0032    | 0.21 | 0.00               | 325.5                                                                 | 20.7      |
| Panasqueira-10                                                    | 0.20 | 0.00                           | 4.51   | 0.001 | 20.10                                   | 0.62      | 0.0512                                   | 0.0043    | 0.356                                   | 0.042     | 0.0498                                  | 0.0015    | 0.26 | 0.00               | 313.5                                                                 | 9.9       |
| Panasqueira-11                                                    | 0.16 | 0.01                           | 3.63   | 0.002 | 20.42                                   | 0.70      | 0.0503                                   | 0.0049    | 0.359                                   | 0.052     | 0.0490                                  | 0.0017    | 0.24 | 0.00               | 309.1                                                                 | 10.8      |
| Panasqueira-12                                                    | 0.08 | 0.00                           | 1.90   | 0.001 | 19.94                                   | 0.95      | 0.0523                                   | 0.0078    | 0.357                                   | 0.076     | 0.0501                                  | 0.0024    | 0.22 | 0.00               | 315.5                                                                 | 15.5      |
| Panasqueira-13                                                    | 0.02 | 0.00                           | 0.52   | 0.003 | 20.70                                   | 1.47      | 0.0504                                   | 0.0192    | 0.350                                   | 0.169     | 0.0483                                  | 0.0034    | 0.15 | 0.00               | 305.0                                                                 | 22.1      |
| Panasqueira-14                                                    | 0.09 | 0.00                           | 2.11   | 0.001 | 19.94                                   | 0.84      | 0.0458                                   | 0.0072    | 0.352                                   | 0.080     | 0.0501                                  | 0.0021    | 0.19 | 0.00               | 318.0                                                                 | 13.6      |
| Panasqueira-15                                                    | 0.06 | 0.00                           | 1.44   | 0.001 | 20.32                                   | 1.23      | 0.0611                                   | 0.0111    | 0.367                                   | 0.097     | 0.0492                                  | 0.0030    | 0.23 | 1.06               | 306.5                                                                 | 19.2      |
| Panasqueira-16                                                    | 0.09 | 0.00                           | 2.07   | 0.001 | 20.42                                   | 0.87      | 0.0524                                   | 0.0073    | 0.350                                   | 0.069     | 0.0490                                  | 0.0021    | 0.21 | 0.00               | 308.2                                                                 | 13.4      |
| Panasqueira-17                                                    | 0.08 | 0.00                           | 1.30   | 0.003 | 22.10                                   | 1.54      | 0.0635                                   | 0.0152    | 0.359                                   | 0.113     | 0.0452                                  | 0.0032    | 0.22 | 1.36               | 281.4                                                                 | 20.3      |
| <b><i>Cornwall W-Sn deposit, United Kingdom (Cornwall)</i></b>    |      |                                |        |       |                                         |           |                                          |           |                                         |           |                                         |           |      |                    |                                                                       |           |
| Cornwall-1                                                        | 0.48 | 0.12                           | 11.41  | 0.011 | 21.96                                   | 0.82      | 0.0691                                   | 0.0075    | 0.354                                   | 0.057     | 0.0455                                  | 0.0017    | 0.23 | 2.15               | 281.0                                                                 | 10.9      |
| Cornwall-2                                                        | 0.79 | 0.17                           | 18.50  | 0.009 | 22.16                                   | 0.60      | 0.0538                                   | 0.0053    | 0.305                                   | 0.040     | 0.0451                                  | 0.0012    | 0.21 | 0.24               | 283.8                                                                 | 7.9       |
| Cornwall-3                                                        | 0.80 | 0.16                           | 18.32  | 0.009 | 22.25                                   | 0.50      | 0.0581                                   | 0.0041    | 0.341                                   | 0.034     | 0.0449                                  | 0.0010    | 0.23 | 0.78               | 281.2                                                                 | 6.5       |
| Cornwall-4                                                        | 0.51 | 0.11                           | 12.21  | 0.009 | 22.22                                   | 0.60      | 0.0592                                   | 0.0048    | 0.328                                   | 0.038     | 0.0450                                  | 0.0012    | 0.23 | 0.92               | 281.3                                                                 | 7.9       |
| Cornwall-5                                                        | 0.55 | 0.13                           | 12.98  | 0.010 | 22.24                                   | 0.40      | 0.0591                                   | 0.0026    | 0.349                                   | 0.021     | 0.0450                                  | 0.0008    | 0.30 | 0.90               | 281.0                                                                 | 5.2       |
| Cornwall-6                                                        | 0.58 | 0.14                           | 14.08  | 0.010 | 22.04                                   | 0.46      | 0.0551                                   | 0.0031    | 0.356                                   | 0.029     | 0.0454                                  | 0.0010    | 0.26 | 0.41               | 284.9                                                                 | 6.1       |
| Cornwall-7                                                        | 0.58 | 0.13                           | 13.90  | 0.009 | 22.24                                   | 0.42      | 0.0559                                   | 0.0026    | 0.327                                   | 0.020     | 0.0450                                  | 0.0009    | 0.30 | 0.50               | 282.2                                                                 | 5.5       |
| Cornwall-8                                                        | 0.51 | 0.11                           | 11.92  | 0.009 | 22.24                                   | 0.38      | 0.0565                                   | 0.0022    | 0.347                                   | 0.018     | 0.0450                                  | 0.0008    | 0.34 | 0.57               | 282.0                                                                 | 5.0       |

Table S2 (continued)

| Sample                                                     | Pb   | Th<br>( $\mu\text{g g}^{-1}$ ) | U     | Th/U  | $^{238}\text{U}$ /<br>$^{206}\text{Pb}$ | $1\sigma$ | $^{207}\text{Pb}$ /<br>$^{206}\text{Pb}$ | $1\sigma$ | $^{207}\text{Pb}$ /<br>$^{235}\text{U}$ | $1\sigma$ | $^{206}\text{Pb}$ /<br>$^{238}\text{U}$ | $1\sigma$ | Rho  | $f_{206}^a$<br>(%) | $^{207}\text{Pb}$ -corrected (Ma)<br>$^{206}\text{Pb}/^{238}\text{U}$ | $1\sigma$ |
|------------------------------------------------------------|------|--------------------------------|-------|-------|-----------------------------------------|-----------|------------------------------------------|-----------|-----------------------------------------|-----------|-----------------------------------------|-----------|------|--------------------|-----------------------------------------------------------------------|-----------|
| Cornwall-9                                                 | 0.56 | 0.13                           | 13.19 | 0.009 | 22.09                                   | 0.40      | 0.0550                                   | 0.0028    | 0.335                                   | 0.022     | 0.0453                                  | 0.0008    | 0.28 | 0.39               | 284.3                                                                 | 5.3       |
| Cornwall-10                                                | 0.56 | 0.13                           | 13.74 | 0.009 | 22.15                                   | 0.49      | 0.0523                                   | 0.0031    | 0.320                                   | 0.025     | 0.0451                                  | 0.0010    | 0.28 | 0.05               | 284.5                                                                 | 6.4       |
| Cornwall-11                                                | 0.81 | 0.16                           | 19.19 | 0.008 | 21.78                                   | 0.41      | 0.0517                                   | 0.0024    | 0.332                                   | 0.020     | 0.0459                                  | 0.0009    | 0.31 | 0.00               | 289.4                                                                 | 5.6       |
| Cornwall-12                                                | 0.44 | 0.11                           | 10.66 | 0.010 | 22.10                                   | 0.43      | 0.0534                                   | 0.0022    | 0.338                                   | 0.018     | 0.0453                                  | 0.0009    | 0.36 | 0.18               | 284.8                                                                 | 5.7       |
| Cornwall-13                                                | 0.55 | 0.11                           | 10.83 | 0.010 | 21.86                                   | 0.45      | 0.0515                                   | 0.0023    | 0.328                                   | 0.019     | 0.0457                                  | 0.0009    | 0.36 | 0.00               | 288.4                                                                 | 6.1       |
| Cornwall-14                                                | 0.50 | 0.11                           | 12.20 | 0.009 | 21.30                                   | 0.46      | 0.0457                                   | 0.0022    | 0.302                                   | 0.019     | 0.0470                                  | 0.0010    | 0.34 | 0.00               | 298.0                                                                 | 6.5       |
| Cornwall-15                                                | 0.58 | 0.12                           | 12.32 | 0.010 | 22.21                                   | 0.57      | 0.0604                                   | 0.0035    | 0.377                                   | 0.030     | 0.0450                                  | 0.0012    | 0.32 | 1.06               | 281.0                                                                 | 7.4       |
| Cornwall-16                                                | 3.83 | 0.13                           | 13.18 | 0.010 | 21.39                                   | 0.46      | 0.0472                                   | 0.0022    | 0.307                                   | 0.018     | 0.0468                                  | 0.0010    | 0.36 | 0.00               | 296.3                                                                 | 6.5       |
| <b><i>Hamme tungsten district, United States (HTD)</i></b> |      |                                |       |       |                                         |           |                                          |           |                                         |           |                                         |           |      |                    |                                                                       |           |
| HTD-1                                                      | 0.11 | 0.01                           | 2.20  | 0.003 | 21.99                                   | 0.58      | 0.0784                                   | 0.0062    | 0.436                                   | 0.043     | 0.0455                                  | 0.0012    | 0.27 | 3.31               | 277.4                                                                 | 7.8       |
| HTD-2                                                      | 0.77 | 0.01                           | 17.24 | 0.000 | 22.19                                   | 0.35      | 0.0521                                   | 0.0016    | 0.330                                   | 0.013     | 0.0451                                  | 0.0007    | 0.41 | 0.03               | 284.1                                                                 | 4.6       |
| HTD-3                                                      | 0.36 | 0.01                           | 8.07  | 0.001 | 22.17                                   | 0.40      | 0.0575                                   | 0.0025    | 0.354                                   | 0.020     | 0.0451                                  | 0.0008    | 0.32 | 0.70               | 282.5                                                                 | 5.3       |
| HTD-4                                                      | 0.34 | 0.00                           | 7.52  | 0.001 | 22.23                                   | 0.40      | 0.0534                                   | 0.0022    | 0.325                                   | 0.017     | 0.0450                                  | 0.0008    | 0.33 | 0.18               | 283.1                                                                 | 5.2       |
| HTD-5                                                      | 0.44 | 0.01                           | 10.20 | 0.001 | 22.20                                   | 0.38      | 0.0568                                   | 0.0022    | 0.351                                   | 0.017     | 0.0451                                  | 0.0008    | 0.35 | 0.62               | 282.3                                                                 | 5.0       |
| HTD-6                                                      | 0.19 | 0.01                           | 3.60  | 0.003 | 21.80                                   | 0.47      | 0.0832                                   | 0.0042    | 0.499                                   | 0.035     | 0.0459                                  | 0.0010    | 0.31 | 3.90               | 278.1                                                                 | 6.3       |
| HTD-7                                                      | 0.13 | 0.01                           | 2.57  | 0.002 | 21.85                                   | 0.52      | 0.0812                                   | 0.0051    | 0.491                                   | 0.042     | 0.0458                                  | 0.0011    | 0.28 | 3.65               | 278.2                                                                 | 7.0       |
| HTD-8                                                      | 0.17 | 0.01                           | 3.55  | 0.002 | 22.09                                   | 0.50      | 0.0675                                   | 0.0042    | 0.415                                   | 0.034     | 0.0453                                  | 0.0010    | 0.28 | 1.95               | 280.0                                                                 | 6.6       |
| HTD-9                                                      | 2.50 | 0.03                           | 59.50 | 0.000 | 22.27                                   | 0.33      | 0.0540                                   | 0.0012    | 0.326                                   | 0.008     | 0.0449                                  | 0.0007    | 0.61 | 0.26               | 282.4                                                                 | 4.3       |
| HTD-10                                                     | 2.28 | 0.03                           | 53.40 | 0.001 | 22.36                                   | 0.33      | 0.0525                                   | 0.0011    | 0.320                                   | 0.008     | 0.0447                                  | 0.0007    | 0.60 | 0.08               | 281.8                                                                 | 4.2       |
| HTD-11                                                     | 1.63 | 0.02                           | 39.20 | 0.000 | 22.29                                   | 0.33      | 0.0528                                   | 0.0013    | 0.320                                   | 0.009     | 0.0449                                  | 0.0007    | 0.53 | 0.11               | 282.6                                                                 | 4.3       |
| HTD-12                                                     | 0.25 | 0.00                           | 5.74  | 0.001 | 22.24                                   | 0.43      | 0.0577                                   | 0.0029    | 0.342                                   | 0.022     | 0.0450                                  | 0.0009    | 0.30 | 0.72               | 281.6                                                                 | 5.6       |
| HTD-13                                                     | 0.14 | 0.00                           | 3.10  | 0.001 | 22.17                                   | 0.51      | 0.0676                                   | 0.0043    | 0.380                                   | 0.031     | 0.0451                                  | 0.0010    | 0.28 | 1.96               | 279.0                                                                 | 6.7       |
| HTD-14                                                     | 0.50 | 0.01                           | 11.66 | 0.001 | 22.25                                   | 0.38      | 0.0593                                   | 0.0022    | 0.351                                   | 0.016     | 0.0449                                  | 0.0008    | 0.37 | 0.93               | 280.8                                                                 | 5.0       |
| HTD-15                                                     | 0.20 | 0.02                           | 4.23  | 0.004 | 21.82                                   | 0.45      | 0.0760                                   | 0.0039    | 0.471                                   | 0.032     | 0.0458                                  | 0.0010    | 0.30 | 3.01               | 280.3                                                                 | 6.1       |
| HTD-16                                                     | 0.30 | 0.01                           | 6.08  | 0.002 | 21.89                                   | 0.43      | 0.0806                                   | 0.0035    | 0.486                                   | 0.028     | 0.0457                                  | 0.0009    | 0.34 | 3.57               | 277.9                                                                 | 5.8       |
| HTD-17                                                     | 0.26 | 0.01                           | 5.65  | 0.001 | 22.17                                   | 0.44      | 0.0654                                   | 0.0031    | 0.374                                   | 0.023     | 0.0451                                  | 0.0009    | 0.32 | 1.68               | 279.8                                                                 | 5.8       |
| HTD-18                                                     | 0.40 | 0.01                           | 9.25  | 0.001 | 22.18                                   | 0.39      | 0.0630                                   | 0.0024    | 0.368                                   | 0.018     | 0.0451                                  | 0.0008    | 0.37 | 1.39               | 280.4                                                                 | 5.2       |
| <b><i>Sweet Home Mine, United States (SHM)</i></b>         |      |                                |       |       |                                         |           |                                          |           |                                         |           |                                         |           |      |                    |                                                                       |           |
| SHM-1                                                      | 0.11 | 0.03                           | 23.63 | 0.001 | 251.3                                   | 9.5       | 0.0542                                   | 0.0078    | 0.0299                                  | 0.0043    | 0.00398                                 | 0.00015   | 0.26 | 0.96               | 25.4                                                                  | 1.0       |
| SHM-2                                                      | 0.06 | 0.14                           | 12.96 | 0.010 | 240.4                                   | 9.2       | 0.0781                                   | 0.0111    | 0.0456                                  | 0.0064    | 0.00416                                 | 0.00016   | 0.27 | 3.99               | 25.7                                                                  | 1.0       |
| SHM-3                                                      | 0.14 | 0.06                           | 34.70 | 0.002 | 251.3                                   | 6.3       | 0.0529                                   | 0.0039    | 0.0299                                  | 0.0022    | 0.00398                                 | 0.00010   | 0.34 | 0.81               | 25.4                                                                  | 0.6       |
| SHM-4                                                      | 0.25 | 0.07                           | 65.10 | 0.001 | 253.2                                   | 5.8       | 0.0461                                   | 0.0033    | 0.0258                                  | 0.0018    | 0.00395                                 | 0.00009   | 0.32 | 0.00               | 25.4                                                                  | 0.6       |
| SHM-5                                                      | 0.11 | 0.04                           | 25.94 | 0.002 | 246.9                                   | 7.9       | 0.0543                                   | 0.0065    | 0.0313                                  | 0.0038    | 0.00405                                 | 0.00013   | 0.27 | 0.99               | 25.8                                                                  | 0.8       |
| SHM-6                                                      | 0.07 | 0.02                           | 18.21 | 0.001 | 246.9                                   | 7.3       | 0.0585                                   | 0.0066    | 0.0336                                  | 0.0038    | 0.00405                                 | 0.00012   | 0.26 | 1.52               | 25.7                                                                  | 0.8       |
| SHM-7                                                      | 0.15 | 0.49                           | 36.62 | 0.013 | 242.7                                   | 5.3       | 0.0623                                   | 0.0043    | 0.0362                                  | 0.0025    | 0.00412                                 | 0.00009   | 0.32 | 1.99               | 26.0                                                                  | 0.6       |

Table S2 (continued)

| Sample | Pb   | Th<br>( $\mu\text{g g}^{-1}$ ) | U     | Th/U  | $^{238}\text{U}/^{206}\text{Pb}$ | $1\sigma$ | $^{207}\text{Pb}/^{206}\text{Pb}$ | $1\sigma$ | $^{207}\text{Pb}/^{235}\text{U}$ | $1\sigma$ | $^{206}\text{Pb}/^{238}\text{U}$ | $1\sigma$ | Rho  | $f_{206}^a$<br>(%) | $^{207}\text{Pb}$ -corrected (Ma)<br>$^{206}\text{Pb}/^{238}\text{U}$ | $1\sigma$ |
|--------|------|--------------------------------|-------|-------|----------------------------------|-----------|-----------------------------------|-----------|----------------------------------|-----------|----------------------------------|-----------|------|--------------------|-----------------------------------------------------------------------|-----------|
| SHM-8  | 0.09 | 0.03                           | 20.71 | 0.002 | 243.3                            | 7.7       | 0.0629                            | 0.0060    | 0.0355                           | 0.0034    | 0.00411                          | 0.00013   | 0.33 | 2.06               | 25.9                                                                  | 0.8       |
| SHM-9  | 0.07 | 0.02                           | 16.84 | 0.001 | 246.3                            | 7.9       | 0.0604                            | 0.0070    | 0.0340                           | 0.0039    | 0.00406                          | 0.00013   | 0.28 | 1.75               | 25.7                                                                  | 0.8       |
| SHM-10 | 0.09 | 0.03                           | 22.95 | 0.001 | 250.6                            | 8.2       | 0.0521                            | 0.0066    | 0.0284                           | 0.0036    | 0.00399                          | 0.00013   | 0.26 | 0.70               | 25.5                                                                  | 0.8       |
| SHM-11 | 0.07 | 0.03                           | 17.42 | 0.002 | 254.5                            | 8.4       | 0.0465                            | 0.0076    | 0.0257                           | 0.0042    | 0.00393                          | 0.00013   | 0.20 | 0.00               | 25.3                                                                  | 0.8       |
| SHM-12 | 0.14 | 0.08                           | 31.38 | 0.002 | 251.9                            | 9.5       | 0.0526                            | 0.0074    | 0.0295                           | 0.0041    | 0.00397                          | 0.00015   | 0.27 | 0.76               | 25.3                                                                  | 1.0       |
| SHM-13 | 0.31 | 0.22                           | 79.80 | 0.003 | 243.9                            | 4.8       | 0.0444                            | 0.0022    | 0.0258                           | 0.0013    | 0.00410                          | 0.00008   | 0.39 | 0.00               | 26.4                                                                  | 0.5       |
| SHM-14 | 0.37 | 0.46                           | 90.30 | 0.005 | 249.4                            | 5.0       | 0.0602                            | 0.0025    | 0.0339                           | 0.0014    | 0.00401                          | 0.00008   | 0.48 | 1.73               | 25.4                                                                  | 0.5       |

<sup>a</sup>  $f_{206}$ , common  $^{206}\text{Pb}$  in total  $^{206}\text{Pb}$ ;  $f_{206} = [(^{207}\text{Pb}/^{206}\text{Pb})_{\text{total}} - (^{207}\text{Pb}/^{206}\text{Pb})_{\text{radiogenic}}] / [(^{207}\text{Pb}/^{206}\text{Pb})_{\text{init}} - (^{207}\text{Pb}/^{206}\text{Pb})_{\text{radiogenic}}]$ ;

<sup>b</sup> Values shown in italics have not been used to calculate average values shown in Table 4.

Table S3 ID-TIMS U-Pb data shown in Fig. 2d.

| Sample                                 | $^{238}\text{U}/$<br>$^{204}\text{Pb}$ | $^{206}\text{Pb}/$<br>$^{204}\text{Pb}$ | $^{207}\text{Pb}/$<br>$^{204}\text{Pb}$ |
|----------------------------------------|----------------------------------------|-----------------------------------------|-----------------------------------------|
| <i>YGX-2107, Hunan Province, China</i> |                                        |                                         |                                         |
| 7Y1                                    | 36500                                  | 928                                     | 60.6                                    |
| 7Y2                                    | 15400                                  | 412                                     | 34.9                                    |
| 7Y3                                    | 60200                                  | 1510                                    | 92.4                                    |
| 7Y4                                    | 29000                                  | 766                                     | 52.5                                    |
| 7Y5                                    | 26800                                  | 719                                     | 50.3                                    |
| 7Y6                                    | 23600                                  | 640                                     | 46.5                                    |

Isotope ratios not shown in Table 3, but used in Fig. 2d to estimate initial Pb isotopic composition.

Isotope ratios corrected for fractionation, blank, isotopic tracer, 15 pg Pb and 1 pg U blank.
